# Supplementary material
Source: PubMed Central journal article supplement (PMC3645585)
Supplement: 1304039110_pnas.201304039SI.pdf [file 1304039110_pnas.201304039SI.pdf]

# Supporting Information

Do and Yau 10.1073/pnas.1304039110

## SI Text

We calculated the number of photoactivated melanopsin molecules in the following way. Previously, we found that the light intensity required to produce one single-photon response,  $I_{\phi}$ , upon illuminating the soma of an intrinsically photosensitive retinal ganglion cell (ipRGC) is  $\sim 4 \times 10^5$  photons per square micron (1). Illumination of both the soma and dendrites would

increase sensitivity by approximately 10-fold, giving  $I_{\phi} = \sim 4 \times 10^4$  photons per square micron (1). To calculate the number of photoactivated melanopsin molecules during a stimulus, we simply divide the stimulus intensity by the appropriate  $I_{\phi}$ . Because we observed a large dispersion in  $I_{\phi}$  values ( $1.2 \times 10^4 - 2.7 \times 10^6$  photons per square micron for 17 cells) (1), we consider this a broad estimate.

1. Do MTH, et al. (2009) Photon capture and signalling by melanopsin retinal ganglion cells. *Nature* 457(7227):281–287.

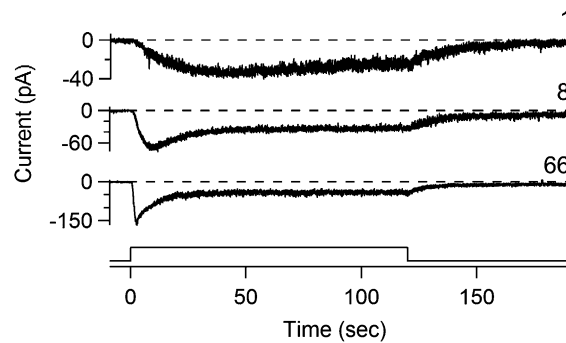

**Fig. S1.** Responses of an ipRGC to 3-min steps of light. Diffuse illumination with 480-nm light of, from top to bottom, 13,400, 108,000, and 890,000 photons per square micron per second. Relative intensities are indicated on the right. Note the different scalings of ordinates. Perforated-patch, voltage-clamp recording ( $-80$  mV) was obtained in flat-mount retina at  $23$  °C. Bath solution was Ames medium with blockers of fast-synaptic transmission.



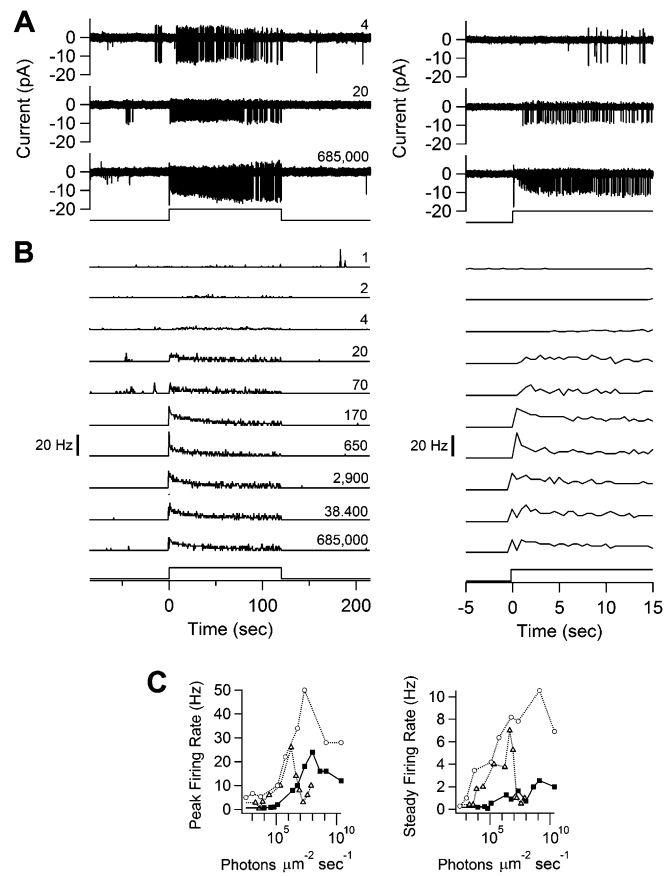

**Fig. S3.** Spiking of ipRGCs during steps of light at 35 °C. Capacitive/extracellular currents associated with spikes were recorded in loose-patch configuration ( $V_{\text{hold}} = 0$  mV; HEPES-buffered Ames intrapipette solution). (*A, Left*) Sample traces from an ipRGC, with increasing intensity from top to bottom (diffuse, 480 nm or white expressed as equivalent 480-nm photons, ranging from  $3.4 \times 10^4$  to  $2.4 \times 10^{10}$  photons per square micron per second). Light monitor is shown at the bottom, with relative intensities marked on the right. (*A, Right*) Same traces shown on an expanded time base at light onset. (*B, Left*) Peristimulus time histograms (PSTHs) of spike activity for the same cell as in *A*, with relative intensity increasing from top to bottom. PSTHs are derived from single or multiple sweeps, with a bin width of 500 ms. (*B, Right*) Same PSTHs shown on an expanded time base at light onset. The spike rate seemingly increases before the stimulus, simply because the stimulus monitor trace has not been binned. (*C*) Plots of peak (*Left*) and steady (*Right*) firing rates versus light-step intensity. The cell from *A* and *B* is indicated with black squares (with some points being unrepresented in *B*); other cells are indicated with other symbols. Peak spike rates were measured at the first transient peak of the PSTH or at maximum if there is no peak. Steady spike rates were measured at the end of the light step. IpRGCs were recorded in flat-mount retina with superfused Ames medium and fast-synaptic transmission blocked pharmacologically (*Materials and Methods*).

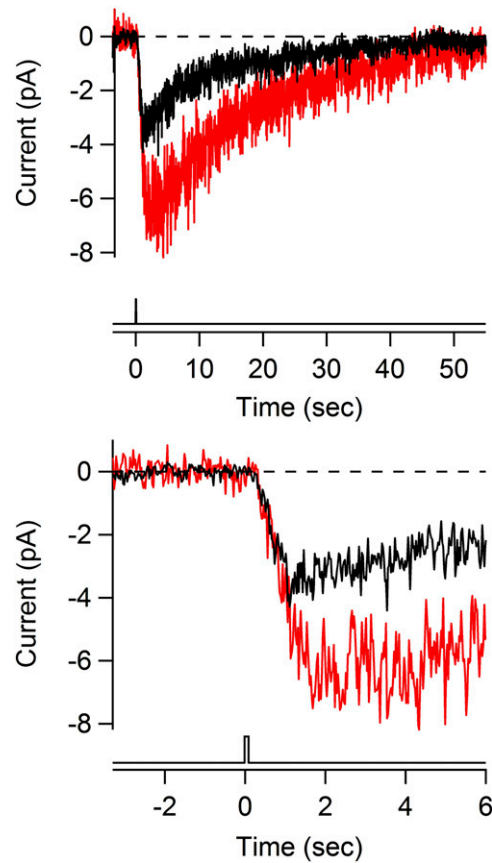

**Fig. S4.** Effect of  $\text{Ca}^{2+}$  influx on light responses of dissociated ipRGCs. (*Upper*) Dim-flash response of an acutely dissociated ipRGC in control solution containing 1.5 mM  $\text{CaCl}_2$  (black trace) versus a solution with  $\text{CaCl}_2$  replaced by  $\text{MgCl}_2$  (no EGTA; red trace). (*Lower*) Same responses plotted on an expanded time base for resolution of the rising phase. Stimulus was 50-ms flash of diffuse, 480-nm light delivering  $1.1 \times 10^8$  photons per square micron. Perforated-patch recording in voltage clamp ( $-80$  mV) was obtained at  $23^\circ\text{C}$ . The current is small (and, therefore, noisy) because the flash intensity is at the low end of this cell's intensity-response relation.
